# Supplementary material for: Genome-wide characterization and expression analyses of the MYB superfamily genes during developmental stages in Chinese jujube
Source: PeerJ. 2019 Jan 24;7:e6353. doi: 10.7717/peerj.6353 (PMC6348095; doi:10.7717/peerj.6353)
Supplement: Supplemental Information 1 [file peerj-07-6353-s001.xlsx]

## Sheet: Sheet1
Table 1. Specific primer pairs
MYB genes of jujube	Primer sequences (5'-3')
ZjMYB10-F	GACTGGGGATGTGCTTTCCA
ZjMYB10-R	TAAGCCGTTGCTGCTCTTCA
ZjMYB18-F	GCTCACTCCGGGTGTAAAGA
ZjMYB18-R	AGTCTGCTGTTGTGGTTGCT
ZjMYB41-F	CTTCGTCGTCGGAGGATCTG
ZjMYB41-R	TTGTCCCGCTCTTCTGAACC
ZjMYB63-F	CGGGCATAGGCATGTATGGA
ZjMYB63-R	TTGGCGGTGCCATTGGATAA
ZjMYB67-F	CATGCCGCCGAGGTTTAATG
ZjMYB67-R	GGAGAGAGCTAGTCCAACGC
ZjMYB69-F	AGAGCCCATGAAAGGTTCGG
ZjMYB69-R	GACCCGATACGACTGTTCCC
ZjMYB92-F	AACCGATGGTCTCTCATCGC
ZjMYB92-R	GGTCGTGGTCTGCTTCTTCA
ZjMYB99-F	GACGCTCAAGAGGAAGTGCT
ZjMYB99-R	TACAAGAGGTAGAACGCCGC
ZjMYB125-F	GCCCAACAAGAAACCGTCAC
ZjMYB125-R	CGGGGCATACCAAAGGAACT
ZjMYB138-F	GGCTGCTCATCCTTACCCTC
ZjMYB138-R	ACCGTTGTAACCCCCTTTGA
UBQ-F	TGGATGATTCTGGCAAAG
UBQ-R	GTAATGGCGGTCAAAGTG
