# Supplementary material for: Genome-wide characterization and expression analyses of the MYB superfamily genes during developmental stages in Chinese jujube
Source: PeerJ. 2019 Jan 24;7:e6353. doi: 10.7717/peerj.6353 (PMC6348095; doi:10.7717/peerj.6353)
Supplement: Supplemental Information 2 [file peerj-07-6353-s002.xlsx]

## Sheet: sheet1
Table 2. Physiological and biochemical characteristics of the ZjMYB genes
Name of group or subfamily	Gene	GeneID	Position on the chromosome	Number of amino acid	Molecular weight	Theoretical pI	Total number of atoms	Instability index	Aliphatic index	Grand average of hydropathicity (GRAVY)	ID of best homolog in Arabidopsis	Corresponding nomenclature for MYB members in Arabidopsis
C10(S14)	ZjMYB1	LOC107412766	Zj01: 504178..506056	374	42125.7	6.41	5790	60.18	66.55	-0.791	AT5G57620	AtMYB36
C10(S14)	ZjMYB21	LOC107411467	Zj02: 17236652..17238733	337	37964.8	6.44	5148	48.29	50.62	-0.844	AT5G57620	AtMYB36
C10(S14)	ZjMYB77	LOC107420595	Zj06: 6554595..6555630	361	40630.5	6.26	5622	50.54	71.08	-0.607	AT3G49690	AtMYB84
C10(S14)	ZjMYB78	LOC107420609	Zj06: 6649268..6651317	314	34389.4	6.24	4718	61.21	64.01	-0.487	AT3G49690	AtMYB84
C10(S14)	ZjMYB94	LOC107423990	Zj08: 3114372..3115917	291	31728.5	8.32	4388	45.82	71.37	-0.54	AT2G36890	AtMYB38
C10(S14)	ZjMYB102	LOC107425014	Zj08: 10859733..10861924	339	37865.2	7.58	5238	55.05	64.75	-0.677	AT3G49690	AtMYB84
C10(S14)	ZjMYB136	LOC107431903	Zj12: 3446834..3449205	343	38266.4	8.25	5235	62.09	58.34	-0.731	AT2G36890	AtMYB38
C11(S5)	ZjMYB12	LOC107435925	Zj01: 37792803..37794207	305	34305.9	5.88	4803	45.35	83.21	-0.471	AT1G22640	AtMYB3
C11(S5)	ZjMYB13	LOC107435974	Zj01: 37868026..37869287	305	34205.9	6.27	4796	45.76	85.15	-0.448	AT1G22640	AtMYB3
C11(S5)	ZjMYB15	LOC107403286	Zj01: 38033791..38035283	324	36742	6.23	5090	47.87	75.22	-0.731	AT5G35550	AtMYB123
C11(S5)	ZjMYB71	LOC107420076	Zj06: 2445875..2447636	305	34060.1	6.71	4706	53.86	64.69	-0.795	AT5G35550	AtMYB123
C11(S5)	ZjMYB96	LOC107424134	Zj08: 3500340..3501856	290	32749.7	6.07	4518	49.89	75.41	-0.675	AT5G35550	AtMYB123
C11(S5)	ZjMYB154	LOC107405576	NW_015453963.1: 16100..17569	324	36763	6.16	5083	47.27	72.81	-0.784	AT5G35550	AtMYB123
C12	ZjMYB149	LOC107404750	NW_015453786.1: 1271..3492	268	31127.9	5.97	4313	80.47	61.49	-1.036	AT5G52600	AtMYB82
C13(S15)	ZjMYB61	LOC107418407	Zj05: 10237703..10239073	229	26407.6	6.71	3638	40.98	65.94	-0.768	AT5G14750	AtMYB66
C14(S6)	ZjMYB14	LOC107403314	Zj01: 38017456..38018779	210	24181.2	9.41	3387	49.17	70.62	-1.037	AT5G40330	AtMYB23
C14(S6)	ZjMYB70	LOC107420097	Zj06: 2409612..2411218	199	23299.3	9.36	3253	61.24	71.11	-0.936	AT5G40330	AtMYB23
C14(S6)	ZjMYB148	LOC107405577	NW_015453963.1: 1046..2381	210	24195.2	9.41	3390	51.13	70.62	-1.037	AT5G40330	AtMYB23
C14(S6)	ZjMYB150	LOC107406469	NW_015454235.1: 4528..8594	222	26206.4	6.09	3613	40.02	62.79	-1.102	AT1G66370	AtMYB113
C14(S6)	ZjMYB165	LOC107434709	NW_015453473.1: 81133..82883	217	25294.4	6.95	3503	60.48	71.43	-0.887	AT1G66370	AtMYB113
C14(S6)	ZjMYB169	LOC107434532	NW_015453463.1: 185421..189371	250	29105.6	7.82	4041	45.4	66.68	-1.04	AT1G66370	AtMYB113
C15(S4)	ZjMYB49	LOC107415776	Zj04: 6678914..6680383	331	37360.5	7.32	5149	51.06	67.82	-0.819	AT4G38620	AtMYB4
C15(S4)	ZjMYB51	LOC107416246	Zj04: 12052005..12054255	217	24261.5	8.65	3384	51.85	73.78	-0.672	AT4G09460	AtMYB6
C15(S4)	ZjMYB83	LOC107421590	Zj06: 23369657..23371419	287	32390.6	8.71	4498	59.7	69.06	-0.682	AT1G22640	AtMYB3
C15(S4)	ZjMYB160	LOC107404478	NW_015453751.1: 36603..38241	284	31104.2	8.98	4354	43.59	75.25	-0.563	AT4G38620	AtMYB4
C16(S12)	ZjMYB91	LOC107423566	Zj07: 27282135..27285270	332	36740.3	6.08	5055	53.6	63.25	-0.634	AT3G61250	AtMYB17
C17(S7)	ZjMYB108	LOC107426233	Zj09: 3965194..3967827	418	46922	4.78	6463	61.6	75.29	-0.731	AT2G47460	AtMYB12
C18	ZjMYB43	LOC107415078	Zj04: 163757..165927	449	49829.7	6.73	6820	48.12	56.55	-1.008	AT3G13540	AtMYB5
C18	ZjMYB92	LOC107423630	Zj08: 423519..425126	293	33694.7	8.99	4681	45.89	64.88	-1.057	AT3G13540	AtMYB5
C18	ZjMYB120	LOC107429773	Zj11: 486787..488027	297	33864.7	5.68	4687	56.24	68.28	-0.94	AT5G49330	AtMYB111
C18	ZjMYB137	LOC107432692	Zj12: 9898771..9900755	323	35595.7	8.2	4913	57.8	65.51	-0.737	AT3G13540	AtMYB5
C19	ZjMYB28	LOC107412592	Zj02: 26856145..26858995	331	36567.6	5.33	5003	62.25	65.71	-0.66	AT5G12870	AtMYB46
C19	ZjMYB57	LOC107417581	Zj05: 2680096..2682401	362	41025.2	5.88	5571	46.93	63.31	-0.878	AT3G08500	AtMYB83
C2(S24)	ZjMYB80	LOC107420842	Zj06: 9717554..9719119	346	38761.2	6.3	5383	52.85	81.5	-0.653	AT1G34670	AtMYB93
C20(S16)	ZjMYB39	LOC107414441	Zj03: 22000569..22003342	303	34188	6.8	4718	49.62	61.82	-0.768	AT5G52260	AtMYB19
C21	ZjMYB123	LOC107430208	Zj11: 3968341..3970491	331	37414.5	6	5100	55.27	60.97	-0.704	AT1G63910	AtMYB103
C21	ZjMYB124	LOC107430169	Zj11: 4007474..4010172	362	40382.6	5.4	5512	62.7	56.6	-0.794	AT1G63910	AtMYB103
C22(S13)	ZjMYB59	LOC107418291	Zj05: 8879058..8881202	389	43445	5.4	5922	51.83	55.89	-0.686	AT5G26660	AtMYB86
C22(S13)	ZjMYB156	LOC107406321	NW_015454174.1: 23599..26219	488	53445.7	7.85	7378	48.47	67.23	-0.597	AT1G57560	AtMYB50
C23	ZjMYB3	LOC107411910	Zj01: 4972004..4973572	368	41303.4	6.36	5676	53.94	69.16	-0.621	AT3G12720	AtMYB67
C23	ZjMYB6	LOC107424110	Zj01: 19760409..19762014	355	40263.4	6.46	5593	56.71	74.39	-0.622	AT3G12720	AtMYB67
C23	ZjMYB30	LOC107412752	Zj03: 591823..596482	420	47237.4	6.02	6580	51.5	77.48	-0.508	AT3G12720	AtMYB67
C23	ZjMYB103	LOC107425254	Zj08: 13188077..13189792	394	43392.2	6.34	5922	63.05	67.66	-0.526	AT3G13890	AtMYB26
C24(S17)	ZjMYB87	LOC107422734	Zj07: 16419587..16421297	296	34314.4	8.99	4731	69.08	63.99	-0.936	AT4G13480	AtMYB79
C24(S17)	ZjMYB135	LOC107431922	Zj12: 3337660..3340284	238	27832.6	5.11	3799	66.99	67.27	-0.9	AT3G53200	AtMYB27
C25(S20)	ZjMYB107	LOC107426114	Zj09: 2631267..2633031	281	32204.3	6.26	4400	59.34	62.81	-0.923	AT2G47190	AtMYB2
C25(S20)	ZjMYB142	LOC107433336	Zj12: 18982030..18984122	347	38753.7	6.3	5313	50.23	67.18	-0.7	AT3G06490	AtMYB108
C26(S20)	ZjMYB118	LOC107429464	Zj10: 18545658..18547230	311	35286.7	7.73	4900	64.38	73.12	-0.671	AT1G68320	AtMYB62
C27(S19)	ZjMYB46	LOC107415291	Zj04: 2337583..2341311	199	22857.7	6.66	3150	51.61	65.73	-0.868	AT5G40350	AtMYB24
C28(S18)	ZjMYB9	LOC107433003	Zj01: 34854853..34856818	516	56216.3	7.38	7732	58.59	58.49	-0.688	AT4G26930	AtMYB97
C28(S18)	ZjMYB31	LOC107412845	Zj03: 1286190..1292498	557	60498.1	5.26	8327	54.98	67.61	-0.575	AT4G26930	AtMYB97
C28(S18)	ZjMYB56	LOC107417084	Zj04: 21664111..21667593	537	58086.4	6.78	7958	59.05	56.52	-0.645	AT2G32460	AtMYB101
C29(S25)	ZjMYB60	LOC107418345	Zj05: 9881680..9883108	282	32365.6	5.74	4493	56.79	69.89	-0.767	AT4G18770	AtMYB98
C29(S25)	ZjMYB143	LOC107409430	NW_015456838.1: 16..2163	474	52752.2	7.28	7330	54.17	71.96	-0.574	AT5G02320	ATMYB3R5
C3(S10)	ZjMYB42	LOC107414848	Zj03: 25569941..25571679	383	42646.6	6.57	5916	43.36	76.21	-0.627	AT5G16770	AtMYB9
C3(S10)	ZjMYB130	LOC107431136	Zj11: 15988857..15990314	360	40137.5	5.42	5552	33.9	72.67	-0.735	AT5G16770	AtMYB9
C30(S21)	ZjMYB68	LOC107419647	Zj05: 30267677..30270271	212	25386.9	10.04	3533	61.92	63.54	-0.953	AT1G17950	AtMYB52
C30(S21)	ZjMYB105	LOC107425670	Zj08: 21877249..21878549	276	31676.4	9.33	4378	54.56	60.8	-0.859	AT4G33450	AtMYB69
C30(S21)	ZjMYB115	LOC107428943	Zj10: 10541730..10544102	455	49832.2	6.19	6774	55.35	55.1	-0.625	AT1G69560	AtMYB105
C30(S21)	ZjMYB141	LOC107433008	Zj12: 14085470..14088190	395	43529.5	7.65	6019	54.45	61.52	-0.721	AT1G69560	AtMYB105
C30(S21)	ZjMYB146	LOC107409049	NW_015456223.1: 880..2757	248	29081.6	8.59	4015	68.13	60.56	-0.955	AT1G17950	AtMYB52
C30(S21)	ZjMYB153	LOC107406106	NW_015454094.1: 9796..11802	349	39860.2	9.32	5488	62.35	59.57	-0.968	AT1G17950	AtMYB52
C31(S23)	ZjMYB34	LOC107413800	Zj03: 14710351..14715141	422	45817.4	5.76	6325	49.77	67.94	-0.531	AT3G55730	AtMYB44
C32(S22)	ZjMYB17	LOC107404541	Zj01: 39148144..39149177	257	28036.8	9.02	3913	63.14	75.49	-0.421	AT2G23290	AtMYB70
C32(S22)	ZjMYB35	LOC107413875	Zj03: 17216584..17217586	257	28017.8	8.76	3907	62.39	75.49	-0.416	AT2G23290	AtMYB70
C32(S22)	ZjMYB69	LOC107420003	Zj06: 1539893..1541389	313	34430.5	7.63	4784	50.96	70.13	-0.633	AT4G37260	AtMYB73
C32(S22)	ZjMYB81	LOC107420865	Zj06: 10063857..10065196	230	25510.2	8.78	3509	55.28	58.96	-0.839	AT5G67300	AtMYB44
C32(S22)	ZjMYB99	LOC107424887	Zj08: 9521974..9523645	336	36075.9	9.18	5055	60.67	76.58	-0.34	AT4G37260	AtMYB73
C32(S22)	ZjMYB112	LOC107427192	Zj09: 15571929..15573098	288	32264	5.84	4484	50.19	71.77	-0.698	AT4G37260	AtMYB73
C33	ZjMYB127	LOC107430642	Zj11: 11540423..11544860	356	40987.8	9.49	5785	57.77	71.85	-0.921	AT5G59780	ATMYB59
C34	ZjMYB114	LOC107428833	Zj10: 8710406..8716325	478	53487.6	6.22	7424	51.59	67.97	-0.775	AT2G02820	AtMYB88
C34	ZjMYB170	LOC107434910	NW_015453488.1: 208356..214383	478	53538.6	6.22	7438	52.42	69.39	-0.766	AT2G02820	AtMYB88
C35	ZjMYB85	LOC107422648	Zj07: 15412723..15414460	296	33380.9	5.06	4674	70.89	76.11	-0.565	AT3G60460	AtMYB125
C35	ZjMYB86	LOC107422649	Zj07: 15421165..15423001	296	33380.9	5.06	4674	70.24	76.11	-0.562	AT3G60460	AtMYB125
C4(S9)	ZjMYB64	LOC107419219	Zj05: 24604641..24607171	341	38533.9	6.18	5331	32.98	75.28	-0.76	AT3G01140	AtMYB106
C4(S9)	ZjMYB65	LOC107419221	Zj05: 24634197..24637658	309	34856	6.76	4845	43.67	80.19	-0.642	AT5G15310	AtMYB16
C4(S9)	ZjMYB66	LOC107419249	Zj05: 25276268..25279661	309	34885	6.8	4847	43.34	80.19	-0.631	AT5G15310	AtMYB16
C4(S9)	ZjMYB116	LOC107428944	Zj10: 11176055..11177915	404	44681.2	6.83	6197	48.98	71.78	-0.562	AT5G15310	AtMYB16
C5(S3)	ZjMYB53	LOC107416948	Zj04: 20314965..20317393	273	31374.6	5.52	4305	51.26	62.89	-0.751	AT3G23250	AtMYB15
C5(S3)	ZjMYB54	LOC107416961	Zj04: 20332520..20334054	246	28267.4	6.01	3878	64.72	57.52	-0.912	AT1G06180	AtMYB13
C5(S3)	ZjMYB164	LOC107403729	NW_015453640.1: 75168..78900	396	45085.6	5.37	6180	54.44	64.97	-0.927	AT1G79180	AtMYB63
C6(S2)	ZjMYB27	LOC107412315	Zj02: 24244537..24246213	280	31740.7	8.87	4404	50.57	67.25	-0.806	AT3G23250	AtMYB15
C6(S2)	ZjMYB88	LOC107422870	Zj07: 18214748..18217134	273	30832.4	5.07	4255	60.82	65.42	-0.633	AT3G23250	AtMYB15
C6(S2)	ZjMYB106	LOC107425754	Zj09: 6368..8153	289	33214.8	5.7	4566	63.58	63.08	-0.879	AT3G23250	AtMYB15
C7(S11)	ZjMYB5	LOC107421995	Zj01: 16559967..16561734	365	41464	5.74	5710	54.23	69.45	-0.728	AT4G21440	AtMYB102
C7(S11)	ZjMYB8	LOC107430280	Zj01: 31591688..31593832	363	40879.7	7.12	5652	46.13	74.99	-0.648	AT4G21440	AtMYB102
C7(S11)	ZjMYB55	LOC107416963	Zj04: 20400669..20402213	359	40269.3	5.36	5594	41.56	78.27	-0.49	AT4G21440	AtMYB102
C8(S1)	ZjMYB48	LOC107415546	Zj04: 4389577..4391678	350	38719.1	6.47	5348	49.49	61.97	-0.711	AT3G28910	AtMYB30
C8(S1)	ZjMYB140	LOC107433002	Zj12: 13955675..13957591	332	37141.5	6.52	5136	56.05	64.91	-0.783	AT1G08810	AtMYB60
C8(S1)	ZjMYB152	LOC107407717	NW_015454915.1: 6131..8156	332	36726.5	6.4	5071	57.34	62.62	-0.807	AT3G47600	AtMYB94
C9	ZjMYB4	LOC107417400	Zj01: 9562190..9564520	322	35915.3	6.37	4981	46.15	69.1	-0.711	AT5G56110	AtMYB80
C9	ZjMYB47	LOC107415341	Zj04: 2642819..2644687	339	38177.3	5.93	5257	56.53	62.98	-0.673	AT3G28470	AtMYB35
C1(S8)	ZjMYB38	LOC107414294	Zj03: 21537752..21539597	160	18529.5	9.63	2616	41.78	84.06	-0.766	AT4G12350	AtMYB42
C1(S8)	ZjMYB40	LOC107414701	Zj03: 24706583..24709119	271	30610.1	5.28	4224	44.39	73.73	-0.746	AT4G22680	AtMYB85
C1(S8)	ZjMYB44	LOC107415133	Zj04: 901630..904359	305	35111.2	5.44	4860	45.65	73.51	-0.81	AT5G14340	AtMYB40
C1(S8)	ZjMYB45	LOC107415212	Zj04: 1578828..1580734	462	52888.7	8.36	7375	47.42	75.11	-0.684	AT3G27340
C1(S8)	ZjMYB113	LOC107428494	Zj10: 4055236..4056592	256	29181.6	5.93	4022	57.06	68.52	-0.811	AT5G14340	AtMYB40
C1(S8)	ZjMYB155	LOC107434917	NW_015453489.1: 16422..25148	329	37401.4	4.95	5137	58.7	65.2	-0.881	AT5G52600	AtMYB82
R1R2R3-MYB	ZjMYB79	LOC107420692	Zj06: 7092904..7101707	1059	116390	5.6	16008	58.62	61.71	-0.653	AT4G32730	AtMYB3R1
R1R2R3-MYB	ZjMYB128	LOC107430641	Zj11: 11613506..11620215	589	64872.8	6.75	8989	58.67	58.81	-0.745	AT5G02320	AtMYB3R5
R1R2R3-MYB	ZjMYB134	LOC107431803	Zj12: 2877223..2883444	931	103720	5.43	14379	48.97	68.93	-0.657	AT4G32730	AtMYB3R1
R1R2R3-MYB	ZjMYB147	LOC107408008	NW_015455103.1: 919..5240	555	61849.4	7.52	8592	57.07	69.19	-0.631	AT5G02320	ATMYB3R5
4R-MYB	ZjMYB62	LOC107418690	Zj05: 14049801..14074817	1103	124567	8.08	17309	51.43	65.69	-0.889	AT3G18100	AtMYB4R
Atypical-MYB	ZjMYB25	LOC107412294	Zj02: 24204744..24211768	555	63144	9.28	8914	49.88	71.8	-0.89	AT1G09770	Atypical-MYB MYB/MYBCDC5
Atypical-MYB	ZjMYB26	LOC107412324	Zj02: 24208961..24211721	636	72449.6	8.29	10232	56.63	74.78	-0.917	AT1G09770	Atypical-MYB MYB/MYBCDC5
Atypical-MYB	ZjMYB20	LOC107411454	Zj02: 16749362..16751540	494	56022.8	9.09	7857	43.46	73.22	-0.759	AT5G41020
Atypical-MYB	ZjMYB82	LOC107421267	Zj06: 15257292..15270478	689	72078	5.8	10028	47.33	72.28	-0.451	AT1G09710
Atypical-MYB	ZjMYB109	LOC107426769	Zj09: 8582336..8594349	1002	110020	4.94	15201	50.18	62.86	-0.806	AT4G39160
Atypical-MYB	ZjMYB121	LOC107429872	Zj11: 1060531..1064507	600	68383.2	7.49	9506	48.58	68.8	-0.704	AT4G11400
Atypical-MYB	ZjMYB122	LOC107429884	Zj11: 1333623..1335920	634	72159.9	8.37	10043	36.54	63.04	-1.085	AT5G41020
Atypical-MYB	ZjMYB161	LOC107404048	NW_015453685.1: 37910..44453	668	74950.9	5.51	10428	46.39	72.78	-0.565	AT2G46040
Atypical-MYB	ZjMYB171	LOC107433899	NW_015453414.1: 291958..296637	567	64350.8	6.94	8990	50.28	71.57	-0.764	AT3G07740
CCA1-like	ZjMYB37	LOC107414100	Zj03: 19321424..19324247	348	37681.6	9.37	5262	49.74	70.09	-0.518	AT5G61620
CCA1-like	ZjMYB41	LOC107414737	Zj03: 25090023..25093468	320	35049.4	9.02	4899	38.37	67.69	-0.594	AT5G52660
CCA1-like	ZjMYB50	LOC107416181	Zj04: 11275988..11279186	451	49955.9	6.87	6948	54.63	64.86	-0.717	AT5G17300
CCA1-like	ZjMYB58	LOC107417866	Zj05: 4905231..4908853	468	51546.4	5.25	7119	55.27	57.22	-0.795	AT5G17300
CCA1-like	ZjMYB72	LOC107420077	Zj06: 2949350..2951829	308	33456.6	9.79	4652	52.21	65.94	-0.543	AT5G56840
CCA1-like	ZjMYB75	LOC107420190	Zj06: 3624626..3626192	377	41907	6.61	5845	53.46	70.56	-0.592	AT5G17300
CCA1-like	ZjMYB89	LOC107423055	Zj07: 20827632..20831625	450	49868.9	6.87	6937	54.73	65	-0.716	AT5G17300
CCA1-like	ZjMYB93	LOC107423826	Zj08: 1697174..1702474	775	85253.1	5.83	11787	58.25	59.97	-0.858	AT1G01060
CCA1-like	ZjMYB125	LOC107430316	Zj11: 7577895..7582782	676	75829.6	8.9	10613	46.46	76.46	-0.326	AT4G17430
CCA1-like	ZjMYB138	LOC107432912	Zj12: 12641851..12646308	302	33345.9	8.53	4688	41.84	74.27	-0.446	AT3G09600
CCA1-like	ZjMYB139	LOC107432960	Zj12: 12871950..12877052	356	38752.6	8.87	5427	43.94	69.41	-0.446	AT4G01280
CCA1-like	ZjMYB163	LOC107435620	NW_015453548.1: 73706..75534	210	23589.1	9.66	3319	56.13	65.9	-0.626	AT5G17300
CCA1-like	ZjMYB167	LOC107435329	NW_015453527.1: 97524..102029	354	38204.9	7.73	5307	65.46	65.31	-0.646	AT3G16350
CPC-like	ZjMYB23	LOC107411922	Zj02: 21499546..21511414	1214	136172	9.07	19018	53.66	68.2	-0.767	AT3G21430
CPC-like	ZjMYB110	LOC107426908	Zj09: 9668462..9680189	1148	128716	8.98	17998	50.46	69.65	-0.753	AT3G21430
CPC-like	ZjMYB145	LOC107409815	NW_015457546.1: 524..1486	130	14920.3	10.39	2129	42.02	81	-0.738	AT2G37025
I-box-binding-like	ZjMYB73	LOC107420262	Zj06: 3523988..3526573	103	11494.8	8.93	1600	56.17	65.34	-0.81	AT1G75250
I-box-binding-like	ZjMYB74	LOC107420249	Zj06: 3565088..3566112	92	10558	7.84	1485	76.75	75.22	-0.846	AT2G21650
I-box-binding-like	ZjMYB158	LOC107404308	NW_015453724.1: 28155..29798	91	10633	7.92	1498	68.54	72.97	-0.975	AT1G75250
I-box-binding-like	ZjMYB159	LOC107403626	NW_015453629.1: 31209..33381	97	10886.2	9.19	1512	65.24	54.33	-0.818	AT4G39250
Jujube-specific	ZjMYB7	LOC107424282	Zj01: 19799602..19802273	363	40101.5	8.55	5583	52.3	67.47	-0.671	AT1G79430
Jujube-specific	ZjMYB10	LOC107434184	Zj01: 35662802..35667123	335	36630.8	6.43	5116	50.14	73.61	-0.763	AT2G01060
Jujube-specific	ZjMYB11	LOC107434110	Zj01: 35688930..35693386	317	34846.4	6.35	4871	44.34	79.68	-0.522	AT3G24120
Jujube-specific	ZjMYB18	LOC107411267	Zj02: 11107579..11110419	404	45141.5	6.43	6284	61.36	66.14	-0.793	AT2G03500
Jujube-specific	ZjMYB24	LOC107412302	Zj02: 24065838..24070236	463	51108.2	5.18	7051	57.94	60.5	-0.865	AT5G29000
Jujube-specific	ZjMYB36	LOC107413888	Zj03: 17433194..17435205	376	42195.6	8.38	5842	56.94	68.24	-0.887	AT2G40260
Jujube-specific	ZjMYB52	LOC107416622	Zj04: 16057516..16062350	235	26893	6.46	3729	57.94	74.21	-0.704	AT2G38300
Jujube-specific	ZjMYB67	LOC107419471	Zj05: 27934459..27941687	451	50295.2	6.16	6884	49.42	58.38	-0.787	AT5G16560
Jujube-specific	ZjMYB76	LOC107420335	Zj06: 4644547..4648475	348	38955.3	8.88	5395	38.18	68.94	-0.797	AT5G42630
Jujube-specific	ZjMYB90	LOC107423514	Zj07: 26585710..26592083	271	29555	7.86	4139	56.99	67.31	-0.879	AT2G01060
Jujube-specific	ZjMYB98	LOC107424698	Zj08: 8248036..8250529	402	44338.5	5.87	6150	59.68	67.71	-0.8	AT4G37180
Jujube-specific	ZjMYB117	LOC107429021	Zj10: 13037134..13039290	342	38418.1	7.18	5348	48.2	72.4	-0.867	AT1G69580
Jujube-specific	ZjMYB119	LOC107429484	Zj10: 18779948..18782609	382	41832.2	7.23	5798	61.53	56.99	-0.937	AT1G25550
Jujube-specific	ZjMYB129	LOC107430904	Zj11: 13964544..13966808	398	44778	8.89	6155	53.48	59.55	-1.047	AT2G38300
Jujube-specific	ZjMYB131	LOC107431228	Zj11: 16610562..16612631	397	44686.9	8.89	6144	53.59	59.7	-1.05	AT2G38300
Jujube-specific	ZjMYB132	LOC107431562	Zj12: 542234..547603	417	47138.9	8.68	6463	55.16	58.75	-0.987	AT1G32240
Jujube-specific	ZjMYB133	LOC107431689	Zj12: 2069780..2072601	462	49997.4	8.11	6913	64.12	62.16	-0.812	AT2G03500
Jujube-specific	ZjMYB144	LOC107409210	NW_015456460.1: 32..1922	138	15711.8	9.42	2201	37.05	73.48	-0.843	AT5G45580
Jujube-specific	ZjMYB157	LOC107435294	NW_015453526.1: 24903..28017	482	53257.4	6.82	7367	46.66	73.49	-0.718	AT3G04030
Jujube-specific	ZjMYB166	LOC107434250	NW_015453438.1: 90792..96652	488	53973.9	5.47	7468	63.83	64.18	-0.827	AT4G28610
Jujube-specific	ZjMYB168	LOC107434378	NW_015453452.1: 175583..180296	269	30467.4	8.87	4266	32.46	73.98	-0.77	AT5G45580
Jujube-specific	ZjMYB2	LOC107411033	Zj01: 4466878..4471374	344	38645.4	6.77	5413	56.36	79.62	-0.644	AT2G38300
R-R-type	ZjMYB33	LOC107413154	Zj03: 4726138..4728887	231	26384.5	6.6	3647	63.04	58.27	-0.846	AT5G04760
R-R-type	ZjMYB63	LOC107418859	Zj05: 16278754..16280411	297	32374.3	7.05	4469	60.85	60.13	-0.695	AT1G49010
R-R-type	ZjMYB84	LOC107421964	Zj07: 3746206..3756913	295	31406.8	6.64	4328	47.87	56.58	-0.692	AT5G08520
R-R-type	ZjMYB126	LOC107430601	Zj11: 11442010..11444475	305	34120.1	9.21	4729	49.12	61.08	-0.737	AT2G38090
R-R-type	ZjMYB151	LOC107407869	NW_015455003.1: 6004..8487	308	35040.5	9.1	4859	49.67	56.98	-0.812	AT2G38090
S9,C4	ZjMYB32	LOC107412894	Zj03: 2233403..2236078	393	43139.2	6.24	5889	54.73	57.4	-0.902	AT5G15310
TBP-like	ZjMYB16	LOC107403503	Zj01: 38245341..38252014	667	73373.9	6.15	10274	58.1	76.54	-0.59	AT1G72650
TBP-like	ZjMYB19	LOC107411450	Zj02: 16609999..16614904	540	60400	6.02	8463	40	79.59	-0.725	AT1G06910
TBP-like	ZjMYB22	LOC107411598	Zj02: 18118050..18126342	540	60414.1	6.02	8466	40	79.78	-0.725	AT1G15720
TBP-like	ZjMYB29	LOC107412672	Zj02: 27443273..27447284	681	76584.2	9.55	10706	63.04	57.53	-1.259	AT2G44430
TBP-like	ZjMYB95	LOC107424012	Zj08: 3297397..3300827	344	38864.9	8.22	5428	45.29	74.8	-0.753	AT5G03780
TBP-like	ZjMYB97	LOC107424083	Zj08: 3725454..3728397	277	30587.5	8.59	4285	40.93	65.23	-0.708	AT1G17520
TBP-like	ZjMYB100	LOC107424928	Zj08: 10349591..10353372	319	35138.2	9.35	5004	38.63	90.16	-0.455	AT1G49950
TBP-like	ZjMYB101	LOC107424918	Zj08: 10353456..10355401	118	13276.3	9.6	1891	34.92	84.41	-0.431	AT1G49950
TBP-like	ZjMYB104	LOC107425232	Zj08: 13266635..13270319	280	30984.1	9.39	4362	45.37	74	-0.691	AT1G17520
TBP-like	ZjMYB111	LOC107426939	Zj09: 10079061..10088526	300	32961.7	9.43	4662	43.31	76.97	-0.481	AT1G49950
TBP-like	ZjMYB162	LOC107404186	NW_015453704.1: 47468..53133	572	65016.9	5.39	9009	56.43	68.99	-0.696	AT1G72650

## Sheet: Sheet2
107412766	Zj01	:	504178	..	506056	Zj01: 504178..506056
107411467	Zj02	:	17236652	..	17238733	Zj02: 17236652..17238733
107420595	Zj06	:	6554595	..	6555630	Zj06: 6554595..6555630
107420609	Zj06	:	6649268	..	6651317	Zj06: 6649268..6651317
107423990	Zj08	:	3114372	..	3115917	Zj08: 3114372..3115917
107425014	Zj08	:	10859733	..	10861924	Zj08: 10859733..10861924
107431903	Zj12	:	3446834	..	3449205	Zj12: 3446834..3449205
107435925	Zj01	:	37792803	..	37794207	Zj01: 37792803..37794207
107435974	Zj01	:	37868026	..	37869287	Zj01: 37868026..37869287
107403286	Zj01	:	38033791	..	38035283	Zj01: 38033791..38035283
107420076	Zj06	:	2445875	..	2447636	Zj06: 2445875..2447636
107424134	Zj08	:	3500340	..	3501856	Zj08: 3500340..3501856
107405576	NW_015453963.1	:	16100	..	17569	NW_015453963.1: 16100..17569
107404750	NW_015453786.1	:	1271	..	3492	NW_015453786.1: 1271..3492
107418407	Zj05	:	10237703	..	10239073	Zj05: 10237703..10239073
107403314	Zj01	:	38017456	..	38018779	Zj01: 38017456..38018779
107420097	Zj06	:	2409612	..	2411218	Zj06: 2409612..2411218
107405577	NW_015453963.1	:	1046	..	2381	NW_015453963.1: 1046..2381
107406469	NW_015454235.1	:	4528	..	8594	NW_015454235.1: 4528..8594
107434709	NW_015453473.1	:	81133	..	82883	NW_015453473.1: 81133..82883
107434532	NW_015453463.1	:	185421	..	189371	NW_015453463.1: 185421..189371
107415776	Zj04	:	6678914	..	6680383	Zj04: 6678914..6680383
107416246	Zj04	:	12052005	..	12054255	Zj04: 12052005..12054255
107421590	Zj06	:	23369657	..	23371419	Zj06: 23369657..23371419
107404478	NW_015453751.1	:	36603	..	38241	NW_015453751.1: 36603..38241
107423566	Zj07	:	27282135	..	27285270	Zj07: 27282135..27285270
107426233	Zj09	:	3965194	..	3967827	Zj09: 3965194..3967827
107415078	Zj04	:	163757	..	165927	Zj04: 163757..165927
107423630	Zj08	:	423519	..	425126	Zj08: 423519..425126
107429773	Zj11	:	486787	..	488027	Zj11: 486787..488027
107432692	Zj12	:	9898771	..	9900755	Zj12: 9898771..9900755
107412592	Zj02	:	26856145	..	26858995	Zj02: 26856145..26858995
107417581	Zj05	:	2680096	..	2682401	Zj05: 2680096..2682401
107420842	Zj06	:	9717554	..	9719119	Zj06: 9717554..9719119
107414441	Zj03	:	22000569	..	22003342	Zj03: 22000569..22003342
107430208	Zj11	:	3968341	..	3970491	Zj11: 3968341..3970491
107430169	Zj11	:	4007474	..	4010172	Zj11: 4007474..4010172
107418291	Zj05	:	8879058	..	8881202	Zj05: 8879058..8881202
107406321	NW_015454174.1	:	23599	..	26219	NW_015454174.1: 23599..26219
107411910	Zj01	:	4972004	..	4973572	Zj01: 4972004..4973572
107424110	Zj01	:	19760409	..	19762014	Zj01: 19760409..19762014
107412752	Zj03	:	591823	..	596482	Zj03: 591823..596482
107425254	Zj08	:	13188077	..	13189792	Zj08: 13188077..13189792
107422734	Zj07	:	16419587	..	16421297	Zj07: 16419587..16421297
107431922	Zj12	:	3337660	..	3340284	Zj12: 3337660..3340284
107426114	Zj09	:	2631267	..	2633031	Zj09: 2631267..2633031
107433336	Zj12	:	18982030	..	18984122	Zj12: 18982030..18984122
107429464	Zj10	:	18545658	..	18547230	Zj10: 18545658..18547230
107415291	Zj04	:	2337583	..	2341311	Zj04: 2337583..2341311
107433003	Zj01	:	34854853	..	34856818	Zj01: 34854853..34856818
107412845	Zj03	:	1286190	..	1292498	Zj03: 1286190..1292498
107417084	Zj04	:	21664111	..	21667593	Zj04: 21664111..21667593
107418345	Zj05	:	9881680	..	9883108	Zj05: 9881680..9883108
107409430	NW_015456838.1	:	16	..	2163	NW_015456838.1: 16..2163
107414848	Zj03	:	25569941	..	25571679	Zj03: 25569941..25571679
107431136	Zj11	:	15988857	..	15990314	Zj11: 15988857..15990314
107419647	Zj05	:	30267677	..	30270271	Zj05: 30267677..30270271
107425670	Zj08	:	21877249	..	21878549	Zj08: 21877249..21878549
107428943	Zj10	:	10541730	..	10544102	Zj10: 10541730..10544102
107433008	Zj12	:	14085470	..	14088190	Zj12: 14085470..14088190
107409049	NW_015456223.1	:	880	..	2757	NW_015456223.1: 880..2757
107406106	NW_015454094.1	:	9796	..	11802	NW_015454094.1: 9796..11802
107413800	Zj03	:	14710351	..	14715141	Zj03: 14710351..14715141
107404541	Zj01	:	39148144	..	39149177	Zj01: 39148144..39149177
107413875	Zj03	:	17216584	..	17217586	Zj03: 17216584..17217586
107420003	Zj06	:	1539893	..	1541389	Zj06: 1539893..1541389
107420865	Zj06	:	10063857	..	10065196	Zj06: 10063857..10065196
107424887	Zj08	:	9521974	..	9523645	Zj08: 9521974..9523645
107427192	Zj09	:	15571929	..	15573098	Zj09: 15571929..15573098
107430642	Zj11	:	11540423	..	11544860	Zj11: 11540423..11544860
107428833	Zj10	:	8710406	..	8716325	Zj10: 8710406..8716325
107434910	NW_015453488.1	:	208356	..	214383	NW_015453488.1: 208356..214383
107422648	Zj07	:	15412723	..	15414460	Zj07: 15412723..15414460
107422649	Zj07	:	15421165	..	15423001	Zj07: 15421165..15423001
107419219	Zj05	:	24604641	..	24607171	Zj05: 24604641..24607171
107419221	Zj05	:	24634197	..	24637658	Zj05: 24634197..24637658
107419249	Zj05	:	25276268	..	25279661	Zj05: 25276268..25279661
107428944	Zj10	:	11176055	..	11177915	Zj10: 11176055..11177915
107416948	Zj04	:	20314965	..	20317393	Zj04: 20314965..20317393
107416961	Zj04	:	20332520	..	20334054	Zj04: 20332520..20334054
107403729	NW_015453640.1	:	75168	..	78900	NW_015453640.1: 75168..78900
107412315	Zj02	:	24244537	..	24246213	Zj02: 24244537..24246213
107422870	Zj07	:	18214748	..	18217134	Zj07: 18214748..18217134
107425754	Zj09	:	6368	..	8153	Zj09: 6368..8153
107421995	Zj01	:	16559967	..	16561734	Zj01: 16559967..16561734
107430280	Zj01	:	31591688	..	31593832	Zj01: 31591688..31593832
107416963	Zj04	:	20400669	..	20402213	Zj04: 20400669..20402213
107415546	Zj04	:	4389577	..	4391678	Zj04: 4389577..4391678
107433002	Zj12	:	13955675	..	13957591	Zj12: 13955675..13957591
107407717	NW_015454915.1	:	6131	..	8156	NW_015454915.1: 6131..8156
107417400	Zj01	:	9562190	..	9564520	Zj01: 9562190..9564520
107415341	Zj04	:	2642819	..	2644687	Zj04: 2642819..2644687
107414294	Zj03	:	21537752	..	21539597	Zj03: 21537752..21539597
107414701	Zj03	:	24706583	..	24709119	Zj03: 24706583..24709119
107415133	Zj04	:	901630	..	904359	Zj04: 901630..904359
107415212	Zj04	:	1578828	..	1580734	Zj04: 1578828..1580734
107428494	Zj10	:	4055236	..	4056592	Zj10: 4055236..4056592
107434917	NW_015453489.1	:	16422	..	25148	NW_015453489.1: 16422..25148
107420692	Zj06	:	7092904	..	7101707	Zj06: 7092904..7101707
107430641	Zj11	:	11613506	..	11620215	Zj11: 11613506..11620215
107431803	Zj12	:	2877223	..	2883444	Zj12: 2877223..2883444
107408008	NW_015455103.1	:	919	..	5240	NW_015455103.1: 919..5240
107418690	Zj05	:	14049801	..	14074817	Zj05: 14049801..14074817
107412294	Zj02	:	24204744	..	24211768	Zj02: 24204744..24211768
107412324	Zj02	:	24208961	..	24211721	Zj02: 24208961..24211721
107411454	Zj02	:	16749362	..	16751540	Zj02: 16749362..16751540
107421267	Zj06	:	15257292	..	15270478	Zj06: 15257292..15270478
107426769	Zj09	:	8582336	..	8594349	Zj09: 8582336..8594349
107429872	Zj11	:	1060531	..	1064507	Zj11: 1060531..1064507
107429884	Zj11	:	1333623	..	1335920	Zj11: 1333623..1335920
107404048	NW_015453685.1	:	37910	..	44453	NW_015453685.1: 37910..44453
107433899	NW_015453414.1	:	291958	..	296637	NW_015453414.1: 291958..296637
107414100	Zj03	:	19321424	..	19324247	Zj03: 19321424..19324247
107414737	Zj03	:	25090023	..	25093468	Zj03: 25090023..25093468
107416181	Zj04	:	11275988	..	11279186	Zj04: 11275988..11279186
107417866	Zj05	:	4905231	..	4908853	Zj05: 4905231..4908853
107420077	Zj06	:	2949350	..	2951829	Zj06: 2949350..2951829
107420190	Zj06	:	3624626	..	3626192	Zj06: 3624626..3626192
107423055	Zj07	:	20827632	..	20831625	Zj07: 20827632..20831625
107423826	Zj08	:	1697174	..	1702474	Zj08: 1697174..1702474
107430316	Zj11	:	7577895	..	7582782	Zj11: 7577895..7582782
107432912	Zj12	:	12641851	..	12646308	Zj12: 12641851..12646308
107432960	Zj12	:	12871950	..	12877052	Zj12: 12871950..12877052
107435620	NW_015453548.1	:	73706	..	75534	NW_015453548.1: 73706..75534
107435329	NW_015453527.1	:	97524	..	102029	NW_015453527.1: 97524..102029
107411922	Zj02	:	21499546	..	21511414	Zj02: 21499546..21511414
107426908	Zj09	:	9668462	..	9680189	Zj09: 9668462..9680189
107409815	NW_015457546.1	:	524	..	1486	NW_015457546.1: 524..1486
107420262	Zj06	:	3523988	..	3526573	Zj06: 3523988..3526573
107420249	Zj06	:	3565088	..	3566112	Zj06: 3565088..3566112
107404308	NW_015453724.1	:	28155	..	29798	NW_015453724.1: 28155..29798
107403626	NW_015453629.1	:	31209	..	33381	NW_015453629.1: 31209..33381
107424282	Zj01	:	19799602	..	19802273	Zj01: 19799602..19802273
107434184	Zj01	:	35662802	..	35667123	Zj01: 35662802..35667123
107434110	Zj01	:	35688930	..	35693386	Zj01: 35688930..35693386
107411267	Zj02	:	11107579	..	11110419	Zj02: 11107579..11110419
107412302	Zj02	:	24065838	..	24070236	Zj02: 24065838..24070236
107413888	Zj03	:	17433194	..	17435205	Zj03: 17433194..17435205
107416622	Zj04	:	16057516	..	16062350	Zj04: 16057516..16062350
107419471	Zj05	:	27934459	..	27941687	Zj05: 27934459..27941687
107420335	Zj06	:	4644547	..	4648475	Zj06: 4644547..4648475
107423514	Zj07	:	26585710	..	26592083	Zj07: 26585710..26592083
107424698	Zj08	:	8248036	..	8250529	Zj08: 8248036..8250529
107429021	Zj10	:	13037134	..	13039290	Zj10: 13037134..13039290
107429484	Zj10	:	18779948	..	18782609	Zj10: 18779948..18782609
107430904	Zj11	:	13964544	..	13966808	Zj11: 13964544..13966808
107431228	Zj11	:	16610562	..	16612631	Zj11: 16610562..16612631
107431562	Zj12	:	542234	..	547603	Zj12: 542234..547603
107431689	Zj12	:	2069780	..	2072601	Zj12: 2069780..2072601
107409210	NW_015456460.1	:	32	..	1922	NW_015456460.1: 32..1922
107435294	NW_015453526.1	:	24903	..	28017	NW_015453526.1: 24903..28017
107434250	NW_015453438.1	:	90792	..	96652	NW_015453438.1: 90792..96652
107434378	NW_015453452.1	:	175583	..	180296	NW_015453452.1: 175583..180296
107411033	Zj01	:	4466878	..	4471374	Zj01: 4466878..4471374
107413154	Zj03	:	4726138	..	4728887	Zj03: 4726138..4728887
107418859	Zj05	:	16278754	..	16280411	Zj05: 16278754..16280411
107421964	Zj07	:	3746206	..	3756913	Zj07: 3746206..3756913
107430601	Zj11	:	11442010	..	11444475	Zj11: 11442010..11444475
107407869	NW_015455003.1	:	6004	..	8487	NW_015455003.1: 6004..8487
107412894	Zj03	:	2233403	..	2236078	Zj03: 2233403..2236078
107403503	Zj01	:	38245341	..	38252014	Zj01: 38245341..38252014
107411450	Zj02	:	16609999	..	16614904	Zj02: 16609999..16614904
107411598	Zj02	:	18118050	..	18126342	Zj02: 18118050..18126342
107412672	Zj02	:	27443273	..	27447284	Zj02: 27443273..27447284
107424012	Zj08	:	3297397	..	3300827	Zj08: 3297397..3300827
107424083	Zj08	:	3725454	..	3728397	Zj08: 3725454..3728397
107424928	Zj08	:	10349591	..	10353372	Zj08: 10349591..10353372
107424918	Zj08	:	10353456	..	10355401	Zj08: 10353456..10355401
107425232	Zj08	:	13266635	..	13270319	Zj08: 13266635..13270319
107426939	Zj09	:	10079061	..	10088526	Zj09: 10079061..10088526
107404186	NW_015453704.1	:	47468	..	53133	NW_015453704.1: 47468..53133
