# Supplementary material for: Genome-wide characterization and expression analyses of the MYB superfamily genes during developmental stages in Chinese jujube
Source: PeerJ. 2019 Jan 24;7:e6353. doi: 10.7717/peerj.6353 (PMC6348095; doi:10.7717/peerj.6353)
Supplement: Supplemental Information 4 [file peerj-07-6353-s004.xlsx]

## Sheet: Motifs
Table 4. Motifs of Related-MYB
Motif 1
Motif 2
Motif 3
Motif 4
Motif 5
Motif 6
Motif 7
Motif 8
Motif 9
Motif 10
Motif 11
Motif 12
Motif 13
Motif 14
Motif 15

## Sheet: Motif and Gene Structure
Table 3. Phylogenetic relationship, conserved motif and gene structure analysis of MYB-related and Atypical-MYB subfamily proteins.
