# Supplementary material for: Genome-wide characterization and expression analyses of the MYB superfamily genes during developmental stages in Chinese jujube
Source: PeerJ. 2019 Jan 24;7:e6353. doi: 10.7717/peerj.6353 (PMC6348095; doi:10.7717/peerj.6353)
Supplement: Supplemental Information 8 [file peerj-07-6353-s008.xlsx]

## Sheet: Sheet1
Table 8. ZjMYB gene synteny analysis
Red: paralogous MYB genes in jujube. Green: orthologous MYB genes between jujube and Arabidopsis. Blue: orthologous MYB genes between jujube and peach.
Chr.	ID of paralogous MYB gene in jujube	Start	End	Chr.	ID of paralogous MYB gene in jujube	Start	End
Zj01	ZjMYB12	37792803	37794207	Zj01	ZjMYB13	37868026	37869287
Zj02	ZjMYB27	24244537	24246213	Zj07	ZjMYB88	18214748	18217134
Zj07	ZjMYB88	18214748	18217134	Zj09	ZjMYB106	6368	8153
Zj08	ZjMYB97	3725454	3728397	Zj08	ZjMYB104	13266635	13270319
Zj08	ZjMYB92	423519	425126	Zj11	ZjMYB120	486787	488027
Chr.	ID of MYB gene in jujube	Start	End	Chr.	ID of MYB gene in Arabidopsis	Start	End
Zj01	ZjMYB4	9562190	9564520	At05	AT5G56110	22719191	22720664
Zj01	ZjMYB8	31591688	31593832	At05	AT5G54230	22016250	22017933
Zj01	ZjMYB9	34854853	34856818	At04	AT4G26930	13527770	13529172
Zj01	ZjMYB9	34854853	34856818	At05	AT5G55020	22324599	22326248
Zj01	ZjMYB1	504178	506056	At05	AT5G57620	23334817	23336566
Zj03	ZjMYB34	14710351	14715141	At03	AT3G55730	20681904	20684053
Zj03	ZjMYB37	19321424	19324247	At05	AT5G61620	24772383	24773507
Zj03	ZjMYB39	22000569	22003342	At04	AT4G25560	13052555	13053618
Zj03	ZjMYB39	22000569	22003342	At05	AT5G52260	21220165	21221288
Zj03	ZjMYB42	25569942	25571679	At03	AT3G02940	661873	664006
Zj03	ZjMYB42	25569942	25571679	At05	AT5G16770	5514884	5516936
Zj03	ZjMYB33	4726138	4728887	At03	AT3G10580	3307051	3308233
Zj03	ZjMYB33	4726138	4728887	At05	AT5G04760	1373530	1374787
Zj04	ZjMYB43	163757	165927	At03	AT3G13540	4420173	4421701
Zj04	ZjMYB44	901630	904359	At05	AT5G14340	4623367	4624847
Zj04	ZjMYB46	2337583	2341311	At03	AT3G27810	10307421	10310308
Zj04	ZjMYB46	2337583	2341311	At03	AT3G01530	210119	211804
Zj04	ZjMYB46	2337583	2341311	At05	AT5G40350	16138544	16141134
Zj04	ZjMYB47	2642819	2644687	At03	AT3G28470	10674508	10675724
Zj04	ZjMYB48	4389577	4391678	At01	AT1G74650	28041191	28042995
Zj04	ZjMYB48	4389577	4391678	At03	AT3G28910	10911157	10913190
Zj05	ZjMYB64	24604988	24607171	At01	AT1G74430	27975179	27977434
Zj05	ZjMYB65	24634197	24637658	At05	AT5G61420	24689151	24690797
Zj06	ZjMYB69	1539893	1541389	At03	At3g50060	18557970	18559106
Zj06	ZjMYB69	1539893	1541389	At05	AT5G67300	26854022	26856006
Zj06	ZjMYB72	2949350	2951829	At05	AT5G56840	22980693	22982342
Zj06	ZjMYB73	3523988	3526573	At01	AT1G75250	28245073	28245453
Zj06	ZjMYB73	3523988	3526573	At01	AT1G19510	6756284	6757377
Zj06	ZjMYB79	7092904	7101707	At04	AT4G32730	15790345	15795854
Zj06	ZjMYB79	7092904	7101707	At05	AT5G11510	3679808	3684877
Zj06	ZjMYB80	9717554	9719119	At01	AT1G34670	12709128	12710423
Zj07	ZjMYB88	18214748	18217134	At03	AT3G23250	8309209	8310826
Zj07	ZjMYB91	27282135	27285270	At03	AT3G61250	22671002	22672738
Zj08	ZjMYB93	1697174	1702474	At01	AT1G01060	33666	37840
Zj08	ZjMYB93	1697174	1702474	At02	AT2G46830	19245672	19248909
Zj08	ZjMYB97	3725454	3728397	At01	AT1G72740	27380294	27382924
Zj08	ZjMYB99	9521974	9523645	At02	AT2G23290	9904787	9905920
Zj08	ZjMYB99	9521974	9523645	At03	At3g50060	18557970	18559106
Zj08	ZjMYB99	9521974	9523645	At04	AT4G37260	17540490	17541799
Zj08	ZjMYB99	9521974	9523645	At05	AT5G67300	26854022	26856006
Zj08	ZjMYB102	10859733	10861924	At03	AT3G49690	18427735	18429201
Zj08	ZjMYB102	10859733	10861924	At04	AT4G37780	17758243	17759557
Zj08	ZjMYB102	10859733	10861924	At05	AT5G65790	26322948	26324578
Zj08	ZjMYB103	13188077	13189792	At03	AT3G13890	4576744	4578027
Zj08	ZjMYB104	13266635	13270319	At01	AT1G72740	27380294	27382924
Zj09	ZjMYB107	2631267	2633031	At02	AT2G47190	19376202	19377531
Zj09	ZjMYB108	3965194	3967827	At02	AT2G47460	19476337	19479478
Zj09	ZjMYB108	3965194	3967827	At03	AT3G62610	23154758	23156585
Zj10	ZjMYB115	10541730	10544102	At01	AT1G26780	9271029	9272463
Zj10	ZjMYB115	10541730	10544102	At01	AT1G69560	26157755	26159094
Zj10	ZjMYB118	18545658	18547230	At01	AT1G25340	8885081	8886398
Zj10	ZjMYB118	18545658	18547230	At01	AT1G68320	25603842	25605096
Zj11	ZjMYB123	3968341	3970491	At01	AT1G63910	23719783	23721774
Zj11	ZjMYB126	11442010	11444475	At05	AT5G58900	23783123	23785334
Zj11	ZjMYB128	11613506	11620215	At05	AT5G02320	483123	486434
Zj11	ZjMYB128	11613506	11620215	At05	AT5G58850	23763945	23765441
Zj11	ZjMYB130	15988857	15990314	At04	AT4G17785	9881635	9883432
Chr.	ID of MYB gene in jujube	Start	End	Chr.	ID of MYB genein peach	Start	End
Zj01	ZjMYB5	16559967	16561734	Pp04	Prupe.4G192000	11547314	11549254
Zj01	ZjMYB5	16559967	16561734	Pp04	Prupe.4G035100	1665597	1667406
Zj01	ZjMYB8	31591688	31593832	Pp04	Prupe.4G192000	11547314	11549254
Zj01	ZjMYB14	38017458	38018467	Pp03	Prupe.3G042100	2999700	3001163
Zj01	ZjMYB3	4972004	4973572	Pp04	Prupe.4G119700	6476925	6478490
Zj03	ZjMYB34	14710351	14715141	Pp06	Prupe.6G267600	25545760	25548576
Zj03	ZjMYB35	17216584	17217586	Pp02	Prupe.2G252700	26648362	26649790
Zj03	ZjMYB42	25569942	25571679	Pp02	Prupe.2G327700	30169885	30171302
Zj04	ZjMYB46	2337583	2341311	Pp03	Prupe.3G286800	25903599	25907493
Zj04	ZjMYB55	20400669	20402213	Pp03	Prupe.3G228500	22736849	22738446
Zj04	ZjMYB55	20400669	20402213	Pp04	Prupe.4G035100	1665597	1667406
Zj05	ZjMYB60	9881680	9883108	Pp05	Prupe.5G172400	14691784	14693582
Zj05	ZjMYB61	10237703	10239073	Pp05	Prupe.5G174200	14846794	14848535
Zj05	ZjMYB62	14049801	14074817	Pp05	Prupe.5G230100	17581425	17587637
Zj05	ZjMYB64	24604988	24607171	Pp03	Prupe.3G264500	24878974	24881601
Zj05	ZjMYB64	24604988	24607171	Pp05	Prupe.5G196100	15892316	15894063
Zj05	ZjMYB68	30267677	30270271	Pp05	Prupe.5G240000	18100144	18102311
Zj06	ZjMYB69	1539893	1541389	Pp01	Prupe.1G430000	36870086	36872519
Zj06	ZjMYB69	1539893	1541389	Pp06	Prupe.6G229000	23259453	23260448
Zj06	ZjMYB70	2409612	2411218	Pp01	Prupe.1G404700	35615203	35616518
Zj06	ZjMYB79	7092904	7101707	Pp01	Prupe.1G452000	38038012	38044400
Zj06	ZjMYB80	9717554	9719119	Pp01	Prupe.1G517400	42530818	42532736
Zj06	ZjMYB81	10063857	10065196	Pp01	Prupe.1G441700	37500456	37501664
Zj07	ZjMYB87	16419587	16421297	Pp01	Prupe.1G051100	3592314	3593660
Zj07	ZjMYB88	18214748	18217134	Pp01	Prupe.1G039200	2785268	2787702
Zj07	ZjMYB88	18214748	18217134	Pp08	Prupe.8G223900	20202688	20204462
Zj08	ZjMYB92	423519	425126	Pp05	Prupe.5G126600	12387311	12388691
Zj08	ZjMYB99	9521974	9523645	Pp06	Prupe.6G229000	23259453	23260448
Zj09	ZjMYB106	6368	8153	Pp01	Prupe.1G039200	2785268	2787702
Zj09	ZjMYB106	6368	8153	Pp08	Prupe.8G223900	20202688	20204462
Zj10	ZjMYB116	11176055	11177915	Pp03	Prupe.3G264500	24878974	24881601
Zj10	ZjMYB118	18545658	18547230	Pp01	Prupe.1G313300	30343380	30344967
Zj10	ZjMYB118	18545658	18547230	Pp05	Prupe.5G222400	17279004	17280722
Zj11	ZjMYB120	486787	488027	Pp05	Prupe.5G126600	12387311	12388691
Zj11	ZjMYB123	3968341	3970491	Pp05	Prupe.5G105700	11206965	11209513
Zj11	ZjMYB128	11613506	11620215	Pp06	Prupe.6G255400	24819480	24824789
Zj11	ZjMYB130	15988857	15990314	Pp05	Prupe.5G031700	3644650	3646266
