# Supplementary material for: Genome-wide characterization and expression analyses of the MYB superfamily genes during developmental stages in Chinese jujube
Source: PeerJ. 2019 Jan 24;7:e6353. doi: 10.7717/peerj.6353 (PMC6348095; doi:10.7717/peerj.6353)
Supplement: Supplemental Information 9 [file peerj-07-6353-s009.xlsx]

## Sheet: 黄酮含量
Subfamily	Fruit development	Y-1	Y-2	Y-3	EN-1	EN-2	EN-3	WM-1	WM-2	WM-3	HR-1	HR-2	HR-3	FR-1	FR-2	FR-3
	Flavonoid content	1.19046	1.25548	1.23528	1.11658	1.1417	1.1082	0.99	1.03	1.02	0.790009	0.658002	0.695437	0.454083	0.405812	0.473292
	Gene	Y-1	Y-2	Y-3	EN-1	EN-2	EN-3	WM-1	WM-2	WM-3	HR-1	HR-2	HR-3	FR-1	FR-2	FR-3
MYB-related	ZJMYB2	0.663544	0.542941	0.469659	1.86439	1.42079	1.54261	2.56317	1.47547	1.73693	0.886409	0.609672	0.273787	0.0366089	0	0
	ZJMYB7	35.9563	39.8081	62.1077	27.152	37.3238	32.3494	14.9887	18.7374	11.0526	20.3214	33.984	12.7511	10.297	14.5401	14.0048
	ZJMYB10	53.1428	51.5437	56.4683	43.8219	49.1048	42.4899	30.593	29.8651	25.5853	20.0187	21.6836	15.0589	18.7728	16.868	18.9642
	ZJMYB11	35.327	28.7752	32.2088	32.3893	32.8062	36.7956	14.5485	16.341	14.239	14.4266	12.8385	10.881	6.81072	5.98398	4.64031
	ZJMYB16	24.8639	23.9849	25.383	21.8073	24.7838	25.0107	17.9969	19.2522	20.5558	29.6952	31.3825	33.1559	24.5142	22.2567	22.4827
	ZJMYB18	42.2411	52.3653	70.7803	32.2229	30.2268	33.7788	9.88837	10.3187	10.6867	13.5065	24.79	9.90943	14.0577	9.445	13.5014
	ZJMYB19	10.4823	11.7328	10.7823	9.78066	9.53555	9.98453	8.325	7.61461	9.59715	9.95668	8.01937	10.3533	12.1326	14.8533	11.7888
	ZJMYB20	2.98835	3.2228	2.89667	4.01437	4.31083	5.2851	2.44557	3.28213	2.80722	3.36871	3.50124	3.28259	2.99653	2.5773	2.86205
	ZJMYB22	3.11681	3.5974	3.90153	3.0978	2.61187	3.56802	2.85152	2.57289	2.45749	3.12826	3.07286	2.79716	4.27208	3.73077	4.1678
	ZJMYB23	10.9618	11.2427	12.2705	11.2945	11.1564	12.1448	13.4776	10.2518	11.5505	11.0364	13.6645	13.4577	12.0257	13.9384	15.718
	ZJMYB24	9.51068	9.50914	10.0741	13.8891	14.6624	14.3342	14.7459	12.6639	12.2183	13.689	11.2109	10.4572	12.3627	15.0961	14.3494
	ZJMYB25	9.5482	8.26347	8.7505	7.33218	8.76688	8.27966	5.28198	5.82173	5.88732	7.08119	6.26407	7.16765	8.70028	9.05646	8.72125
	ZJMYB26	13.5454	13.8546	14.9376	13.6545	14.084	13.36	11.3858	10.3494	10.1556	12.9569	10.3839	12.9811	15.4752	15.1539	14.6581
	ZJMYB29	1.93303	2.30221	2.8901	2.06676	1.94391	1.34471	3.13028	2.6347	2.62039	2.99556	4.19664	3.45782	2.81552	3.01867	2.21946
	ZJMYB33	7.94961	14.2819	13.1789	12.6484	13.2169	11.5055	9.39444	7.9734	8.69914	20.6247	19.7693	22.4057	9.50184	13.6202	9.94582
	ZJMYB41	37.8648	40.643	32.6857	43.8354	58.4642	44.1907	73.1465	74.2097	69.9623	99.163	104.298	97.3203	88.3072	111.94	124.478
	ZJMYB50	1.56232	1.15522	1.51201	1.5437	1.75575	1.34676	2.33761	1.14725	3.16876	1.65903	1.20219	1.9083	1.28222	2.30181	1.85196
	ZJMYB52	0	0.0628018	0.383263	0	0	0.14221	0.221438	0.0321237	0.0635401	0.584273	1.41887	0	0.0613966	0.0298046	0.0304829
	ZJMYB58	17.9111	20.6221	27.6885	9.94083	9.15119	7.18434	21.2497	20.1591	18.5986	10.371	13.9764	11.1801	19.9145	22.4576	27.003
	ZJMYB63	23.5635	31.2729	21.924	30.7525	33.589	28.3601	35.149	47.9971	45.4854	25.7401	18.1831	20.7009	6.57258	6.26663	3.8874
	ZJMYB67	26.0502	29.2343	28.8829	38.2442	39.1731	39.6937	47.6136	46.7184	40.7674	52.5507	45.7868	48.69	63.3889	53.4858	49.9768
	ZJMYB72	44.0496	33.7138	44.1457	9.38693	13.367	10.4025	0	0.3014	0.149773	0.0508307	0	0	0	0	0
	ZJMYB73	0.407807	0.301943	0.547879	0.397632	0.171248	0.232226	0	0.058633	0.11789	0.448565	1.25194	0.0590014	0.0559745	0.112306	0.215367
	ZJMYB75	0.142057	0.669983	0.623161	0.299951	0.562118	0.73561	0.303385	0.513441	0.769655	0.229189	0.267446	0.334186	0.4038	0.394631	0.356785
	ZJMYB76	0.12553	0.622986	0.4654	0.0938249	0.0622258	0.063531	0	0.0313773	0	0	0.0629762	0	0	0.0297048	0
	ZJMYB82	18.8402	18.9508	15.7832	16.3992	15.2444	15.0576	12.7026	16.5026	14.8508	12.0032	12.2202	12.4086	15.6026	17.815	17.528
	ZJMYB84	18.4714	16.8221	14.8622	17.0472	17.6755	15.7822	8.06769	10.7258	10.7005	13.1652	13.5919	14.1195	8.67078	9.33595	10.7747
	ZJMYB89	1.17322	1.47525	1.48118	1.64089	1.29964	1.43612	2.54111	1.9027	2.57787	1.22262	1.63499	1.26495	1.07056	1.21176	1.77808
	ZJMYB90	17.0541	16.7781	19.7369	22.5712	21.8059	22.0125	19.5502	19.3214	18.1439	23.2074	23.3419	21.3244	18.8447	18.7217	16.956
	ZJMYB93	351.621	324.59	303.286	31.1072	31.6594	29.8964	266.027	307.722	247.697	79.6352	66.7403	83.5947	88.0465	88.6654	78.0755
	ZJMYB95	1.65153	1.77708	1.69323	2.08337	1.90042	1.49191	0.366268	1.10593	1.03761	0.521261	0.829631	0.56149	0.293231	0.0575224	0.258399
	ZJMYB97	15.5089	15.415	14.3691	18.8757	21.6063	16.4117	14.8697	14.5856	12.5909	24.5517	21.3328	20.1977	16.6742	17.7071	17.5448
	ZJMYB98	20.1034	21.6829	27.6725	25.9594	30.2448	30.796	9.26215	9.46663	8.4652	11.0213	13.8563	9.5084	6.48385	5.76146	6.07328
	ZJMYB100	15.4202	15.9223	14.8798	19.5516	21.8213	18.6076	11.7293	17.7906	12.6557	16.3387	13.076	15.3786	12.2708	11.6729	8.85748
	ZJMYB101	10.037	13.7992	13.2506	9.91352	12.6568	12.3687	14.4571	12.7044	11.8001	15.7929	11.111	16.7124	9.79175	8.70479	10.3173
	ZJMYB104	6.55775	6.60628	6.11204	4.47462	4.98463	6.67414	2.94291	2.92536	3.48505	5.57371	6.32227	6.53081	5.16516	5.75024	5.14524
	ZJMYB109	4.06708	4.30502	4.65739	4.31501	4.89414	5.11611	3.91331	2.67356	3.20647	5.30573	4.73798	5.1777	6.6383	5.19141	6.57822
	ZJMYB110	9.26125	9.18471	9.8619	9.40213	9.75235	11.3614	11.7219	8.83821	9.608	12.3718	11.9232	14.4823	20.9906	21.6768	19.5009
	ZJMYB111	22.8913	20.368	22.2362	21.9741	22.5735	22.365	23.2391	21.254	21.9837	24.883	26.3039	24.7869	32.6273	37.5777	38.1158
	ZJMYB117	28.8502	31.9363	33.3701	21.3828	24.1453	23.1721	3.81094	5.35527	4.8957	4.19122	5.15771	4.85193	1.04307	2.54284	1.65981
	ZJMYB119	6.67926	10.1408	11.7502	13.0835	10.5082	8.98851	3.62323	4.65454	8.75349	7.66751	10.0457	5.23701	4.88817	5.82068	4.44097
	ZJMYB121	5.3325	5.46787	5.98254	4.47865	3.93053	5.53937	8.94087	8.13969	6.25999	6.91499	5.6791	6.72376	9.1893	8.0937	9.07483
	ZJMYB122	6.01196	6.15203	5.63375	4.58663	5.40137	4.64948	1.68892	2.00147	2.06789	2.29117	2.45005	2.37568	2.56268	3.20577	3.73038
	ZJMYB125	73.0371	66.1759	70.233	76.2786	81.5905	67.144	21.4009	33.5723	24.9066	32.2231	36.6571	23.1872	14.0327	13.7987	11.5875
	ZJMYB126	24.2003	25.0199	26.3889	15.9151	17.5147	15.0954	8.98048	13.0768	10.1765	10.1663	14.9529	9.18553	6.88958	6.88912	4.6296
	ZJMYB132	27.7244	33.8768	29.1226	30.8952	27.4101	28.1985	10.0438	8.7942	10.8128	11.7184	10.8109	11.982	11.5284	12.0013	12.8239
	ZJMYB133	18.3953	15.3831	17.597	14.5659	14.6152	12.1813	7.12791	7.21711	3.9273	6.56157	11.5153	7.12256	3.03384	4.3642	3.52949
	ZJMYB138	39.0657	35.3295	37.714	6.87081	5.90209	7.91422	77.3194	73.0628	61.7544	12.0408	14.5955	14.018	53.4929	63.4742	71.5495
	ZJMYB139	15.8295	17.1611	18.9919	15.2756	17.8608	15.7385	15.4248	14.894	16.9403	24.6217	24.7114	25.2879	26.404	29.9296	29.4831
R2R3-MYB	ZJMYB4	0	0.0810138	0	0	0.0377887	0	0.164049	0.0371072	0.188939	0.180985	0.394823	0.406255	0.593161	0.607557	1.05068
	ZJMYB5	0.182501	0.380993	0.815787	0.129643	0.514473	0.481974	0.183722	0	0.125693	0.0411366	0.20713	0	0.0404825	0	0.201054
	ZJMYB8	0.0491977	1.12881	11.3404	0	0.0480121	0.098066	0	0	0	0.338407	4.72955	0	0.0923872	0.0922292	0.0910907
	ZJMYB9	0.178736	0.241149	0.225031	0.370266	0.379131	0.224988	0.348621	0.323377	0.466993	0.310449	0.863208	0.443871	0.393733	0.250502	1.16913
	ZJMYB31	7.74372	6.75194	8.13402	6.75602	7.49608	8.44104	10.0792	8.92282	7.61337	5.30591	5.04418	3.92349	5.85603	5.38192	4.6735
	ZJMYB32	13.1889	14.8752	10.1746	17.362	14.7556	16.2962	0.680283	1.67012	0.560838	0.512704	0.369618	0.285496	0	0	0
	ZJMYB34	2.3667	1.77615	2.4233	3.48541	3.26627	3.44811	5.46813	4.01608	5.40141	8.18912	6.92115	8.87671	8.84221	10.894	10.5171
	ZJMYB42	0	0	0	0.372918	0.318397	0.424357	12.0758	8.43855	10.5594	4.68768	5.34413	5.49373	5.5735	5.89168	3.50336
	ZJMYB43	29.1873	29.319	19.1938	17.3644	15.8362	18.6673	37.9764	22.7339	21.6924	16.0524	12.5817	14.5195	1.04479	5.43867	1.23138
	ZJMYB44	0.0330427	0.0691747	0	0	0	0	0.0380348	0.0697035	0.138145	0.0713476	0.212562	0.291026	0.153923	0.466687	0.395165
	ZJMYB45	2.52475	1.26346	2.16006	2.44909	1.34098	2.65084	2.94174	2.18383	2.65223	3.78685	3.20852	4.08739	4.2003	2.2157	2.62459
	ZJMYB48	48.6053	58.002	52.5906	69.2917	62.654	73.914	86.5407	70.826	51.0232	66.8675	53.2243	63.906	43.7665	54.9264	73.846
	ZJMYB49	2.79328	3.30016	1.89132	4.35959	3.67842	4.50359	1.2863	0.54922	0.274079	0.045392	0.0911159	0.0922932	0	0	0
	ZJMYB51	45.7416	44.5674	33.887	32.6011	30.5655	35.5385	42.6772	22.7472	15.6455	42.4804	24.2313	28.5792	0.87597	3.85168	0.928945
	ZJMYB59	3.51889	5.02313	5.50112	2.10913	2.03334	2.37734	0.209591	0.265725	0	0.113256	0	0.114143	0	0.0701359	0
	ZJMYB61	1.18738	1.25555	2.19089	2.31177	2.30164	1.06358	0.0835857	0	0	0.150132	0	0	0.0732107	0.217306	0.218227
	ZJMYB69	48.419	73.4181	112.866	88.3404	79.1228	86.0876	136.476	155.603	118.893	160.962	209.402	143.547	72.4743	101.297	73.5698
	ZJMYB71	4.14948	5.06435	3.13003	4.58392	4.44492	4.38156	12.6852	8.42562	8.37362	2.86387	2.2396	1.91296	2.9747	6.80952	7.96929
	ZJMYB77	0	0.426618	0.376135	0	0.0496845	0	0.871693	0.649207	1.24528	0.0978696	0.14578	0.0501588	0.096697	0	0.0482361
	ZJMYB78	0.561598	0.765842	1.18016	1.98125	0.639601	1.73382	0.400681	0.682109	0.733201	0.0508992	0.204815	0.209233	0	0	0.206158
	ZJMYB80	0	0.0561082	0.0572344	1.25581	0.573853	2.08613	1.7752	1.77385	5.36503	0.0516859	0.466577	0.211447	0	0.0504274	0.149811
	ZJMYB81	4.41803	14.0489	24.5827	13.5107	7.00141	14.5561	0.0470996	0.383639	0.517879	0.281966	0.842455	0.0412134	0	0.0859854	0
	ZJMYB83	0.775577	1.08419	0.95746	0.342546	0.470357	0.262273	1.28472	0.778076	1.35849	0.658177	1.73133	0.441347	0.340726	0.247217	0.0411373
	ZJMYB92	122.757	142.125	99.1106	81.2407	83.4547	79.0343	9.00128	10.6835	2.9535	9.23758	1.14794	1.25139	0	0.0816848	1.52415
	ZJMYB99	70.3434	83.4802	98.9702	111.274	110.887	116.832	90.1341	79.4455	85.3932	62.3572	70.8601	60.5921	100.82	130.253	143.854
	ZJMYB102	1.06975	0.856486	0.470133	5.18393	4.53804	5.18752	1.89702	2.09219	1.91876	0.708126	0.564665	0.468965	0	0.103972	0.0336795
	ZJMYB103	0.255841	0.0673586	0.067792	0.182984	0.242749	0.123167	0.0649361	0.29602	0.593434	0.171389	0.171522	0.116727	0.0583693	0	0.0581938
	ZJMYB106	2.82836	11.1199	38.7288	14.879	13.1099	24.5721	4.65996	4.83477	4.91716	7.37619	15.4847	3.97204	2.69341	4.01767	10.5514
	ZJMYB107	0.174797	3.75942	9.01026	0.742697	0.609491	0.751347	51.3247	39.1495	45.4526	36.8563	41.2479	32.5688	52.1286	49.7079	54.4812
	ZJMYB108	7.46138	8.95256	7.83079	0.800182	0.71797	0.610811	0.548912	0.536559	1.78439	0.463323	0.584048	0	0	0	0
	ZJMYB112	0.582462	1.79927	3.33936	0.738204	0.574371	0.861667	0.111025	0.250598	0.252458	0.809036	2.29479	0.104409	0.0993985	0.0516247	0
	ZJMYB114	4.02472	5.11379	3.49446	6.20452	5.88878	7.13539	1.66582	2.09644	2.06589	2.6506	3.17057	2.76564	0.86617	0.830951	1.07483
	ZJMYB118	3.80097	12.8344	30.0525	0.795659	1.23246	1.15662	5.23199	7.73121	9.20259	12.8535	43.1131	4.03995	2.95332	4.67799	3.52402
	ZJMYB127	59.6039	58.295	67.9705	45.6297	43.4575	43.3627	12.0729	18.8776	12.9206	12.3822	10.4694	9.55065	2.81239	3.19155	1.58356
	ZJMYB135	0.142984	0.0498885	0.151556	0.193964	0.339294	0.198065	0.216049	0.347287	0.446875	0.358041	0.253225	1.03856	0.532155	0.851223	0.756651
	ZJMYB136	5.55777	7.67988	4.2395	29.9753	27.6289	29.8181	6.70932	6.19059	6.34876	3.89772	3.32634	2.55058	0.413568	0.248851	0.563228
	ZJMYB137	0.945418	1.57	1.17509	3.45674	2.07189	3.08956	27.7728	12.4463	11.3388	27.7986	18.5272	27.7346	5.13639	7.74291	7.35668
	ZJMYB140	3.75028	4.55361	4.06764	7.56803	4.81519	5.17452	0.784906	1.05791	0.819085	0.747902	0.887171	0.288855	0	0.0427816	0.0411617
	ZJMYB141	3.83121	3.91902	5.46233	2.77057	2.63625	3.98037	0.521744	0.477628	0.223851	0.655337	1.31796	0.40434	1.02135	1.28692	1.3109
	ZJMYB142	0.0978479	0.155631	0.153629	0.0459771	0.0909977	0.280039	0.238546	0.0865978	0.174246	0.340394	2.00866	0.043268	0.550257	0.652112	1.61138
R1R2R3-MYB	ZJMYB79	27.4419	24.7435	24.7247	15.0425	15.8126	17.7343	10.6399	13.8631	11.5428	6.23998	7.97833	6.38383	7.04974	7.35561	7.86855
	ZJMYB128	12.1038	11.4442	11.183	8.60159	10.0254	9.49778	8.0358	7.01003	6.93339	8.32487	8.38956	7.85894	12.8727	13.3151	12.6205
	ZJMYB134	3.75337	5.02086	4.56029	3.86894	3.6509	3.75861	0.0198898	0.129978	0.184139	0.0977741	0.182565	0.0842989	0.159023	0.123057	0.194963
4R-MYB	ZJMYB62	4.29981	4.77783	3.79483	3.59638	3.35836	3.46355	4.7861	3.22756	3.615	2.9428	3.37615	3.48734	8.04869	9.12719	9.55585
